RESEARCH ARTICLE

# Understanding how different surfaces and environmental biofilms found in food processing plants affect the spread of COVID-19

Austin Featherstone<sup>1</sup>, Amanda Claire Brown<sup>2</sup>, Sapna Chitlapilly Dass<sup>1</sup> \*

Department of Animal Science, Texas A&M University, College Station, Texas, United States of America

✉ Current address: Department of Biology, Tarleton State University, Stephenville, Texas, United States of America

\* [sapna.dass@agnet.tamu.edu](mailto:sapna.dass@agnet.tamu.edu)

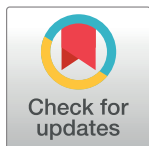

## Abstract

Meat processing plants have been at the center of the SARS-CoV-2 pandemic, with a recent report citing 90% of US facilities having multiple outbreaks during 2020 and 2021. We explored the potential for biofilms to act as a reservoir in protecting, harboring, and dispersing SARS-CoV-2 throughout the meat processing facility environment. To do this, we used Murine Hepatitis Virus (MHV), as a surrogate for SARS-CoV-2, and meat processing facility drain samples to develop mixed-species biofilms on materials found in meat processing facilities (stainless steel (SS), PVC, and ceramic tiles). After exposure to the biofilm organisms for five days post-inoculation at 7°C we conducted quantitative PCR (qPCR) and plaque assays to determine whether MHV could remain both detectable and viable. Our data provides evidence that coronaviruses can remain viable on all the surfaces tested and are also able to integrate within an environmental biofilm. Although a portion of MHV was able to remain infectious after incubation with the environmental biofilm, a large reduction in plaque numbers was identified when compared with the viral inoculum incubated without biofilm on all test surfaces, which ranged from 6.45–9.27-fold higher. Interestingly, we observed a 2-fold increase in the virus-environmental biofilm biovolume when compared to biofilm without virus, indicating that the biofilm bacteria both detected and reacted to the virus. These results indicate a complex virus-environmental biofilm interaction. Although we observed better survival of MHV on a variety of surfaces commonly found in meat processing plants alone than with the biofilm, there is the potential for biofilms to protect virions from disinfecting agents, which has implications for the potential of SARS-CoV-2 prevalence within the meat processing plant environment. Also given the highly infectious nature of SARS-CoV-2, particularly for some of the variant strains such as omicron, having even a residual level of virus present represents a serious health hazard. The increase in biofilm biovolume in response to virus is also a concern for food safety due to the potential of the same being seen with organisms associated with food poisoning and food spoilage.

## OPEN ACCESS

**Citation:** Featherstone A, Brown AC, Chitlapilly Dass S (2023) Understanding how different surfaces and environmental biofilms found in food processing plants affect the spread of COVID-19. PLoS ONE 18(6): e0286659. <https://doi.org/10.1371/journal.pone.0286659>

**Editor:** Ricardo Santos, Universidade Lisboa, Instituto superior Técnico, PORTUGAL

**Received:** May 25, 2022

**Accepted:** May 20, 2023

**Published:** June 7, 2023

**Copyright:** © 2023 Featherstone et al. This is an open access article distributed under the terms of the [Creative Commons Attribution License](https://creativecommons.org/licenses/by/4.0/), which permits unrestricted use, distribution, and reproduction in any medium, provided the original author and source are credited.

**Data Availability Statement:** All relevant data are within the manuscript and its [Supporting Information](#) files.

**Funding:** SCD received USDA-NIFA 2020-67015-32330 grant for support of this study. The funders had no role in study design, data collection and analysis, decision to publish, or preparation of the manuscript.

**Competing interests:** The authors have declared that no competing interests exist.

## Introduction

Coronaviruses are a diverse group of positive-sense, enveloped, single-stranded RNA viruses [1]. Beta-coronaviruses are part of a diverse group of positive-sense, enveloped, single-stranded RNA viruses that exclusively infect mammals [1, 2]. To date, there are nine known human coronaviruses, of which, three are documented to be highly pathogenic and lethal: Middle-East Respiratory Syndrome Coronavirus (MERS-CoV), Severe Acute Respiratory Syndrome Coronavirus (SARS-CoV), and SARS-CoV-2 [3–5]. Prior to SARS-CoV-2, coronaviruses such as MERS-CoV and SARS-CoV could only be transmitted to humans through an animal reservoir [6–10]. Thus, SARS-CoV-2, the etiologic agent of Coronavirus Disease 2019 (COVID-19), spread across the world in a few months [11, 12]. Due to how quickly the virus spread at the beginning of 2020, and the severe number of COVID-19 cases seen around the world, many businesses had to temporarily close to help prevent the spread of COVID-19 [13–15].

Meat processing plants have been at the center of the SARS-CoV-2 pandemic, with a recent report citing 90% of US facilities experiencing multiple outbreaks during 2020 and 2021, most likely due to the environmental conditions inside of the meat processing plant being an excellent reservoir for SARS-CoV-2 and other harmful pathogens, such as biofilms, to be able to survive [16]. Biofilms are multicellular assemblages of prokaryotic and eukaryotic cells that are enclosed in a polysaccharide material [17, 18]. Bacterial and fungal biofilms have so far been a focus of research in food processing facilities, with biofilms considered a major threat to food safety, due to the carriage of foodborne pathogens [19, 20]. Research on the presence of virus particles in the mixed-species biofilm community is sparse, however, there are reports of biofilms protecting viruses from disinfectants, particularly chlorine [21], and the emergence of SARS-CoV-2 following colonization of a progenitor coronavirus from biofilms associated with bat habitats has been considered [22].

There are several factors that exist which allow us to consider biofilms as an ideal site to harbor SARS-CoV-2 in meat processing facilities. One reason is that meat processing facilities themselves are maintained at 4–7°C, and SARS-CoV-2 virions are both stable at colder temperatures and able to persist for several days on stainless steel (SS), copper, plastic, PVC and cardboard [23], all of which are materials commonly found in meat processing plants. Therefore, these facilities have a high potential for the harboring and transmitting SARS-CoV-2 [24]. While bacteria individually do not support virus infection, they can promote viral fitness as some viruses can use components of the bacterial envelope to enhance their stability [25–27]. As previously mentioned biofilms can also provide physical protection from disinfecting agents [21]. Moreover, bacterial communities and biofilms can impact the infection of mammals by viruses [25, 26, 28]. Furthermore, from a biophysics perspective, virus stability could also be enhanced by the thin liquid film produced by bacterial biofilms, preventing desiccation [23, 29].

To date, there is a critical gap of knowledge in understanding the stability and infectious state of SARS-CoV-2 in multi-species biofilms, particularly in meat processing plants. In this study, MHV was employed as a surrogate to elucidate the survival of coronaviruses within biofilms. MHV survival was analyzed by RT-qPCR and plaque assays following inoculation of MHV into meat processing plant environmental biofilms developed on SS, PVC, and ceramic tiles at 7°C.

## Results

### Mixed species biofilm cell numbers on all test surfaces are increased in the presence of MHV

To determine if MHV influences the growth or decay of an environmental biofilm when inoculated together on different solid surfaces found in meat processing plants, we grew biofilms,

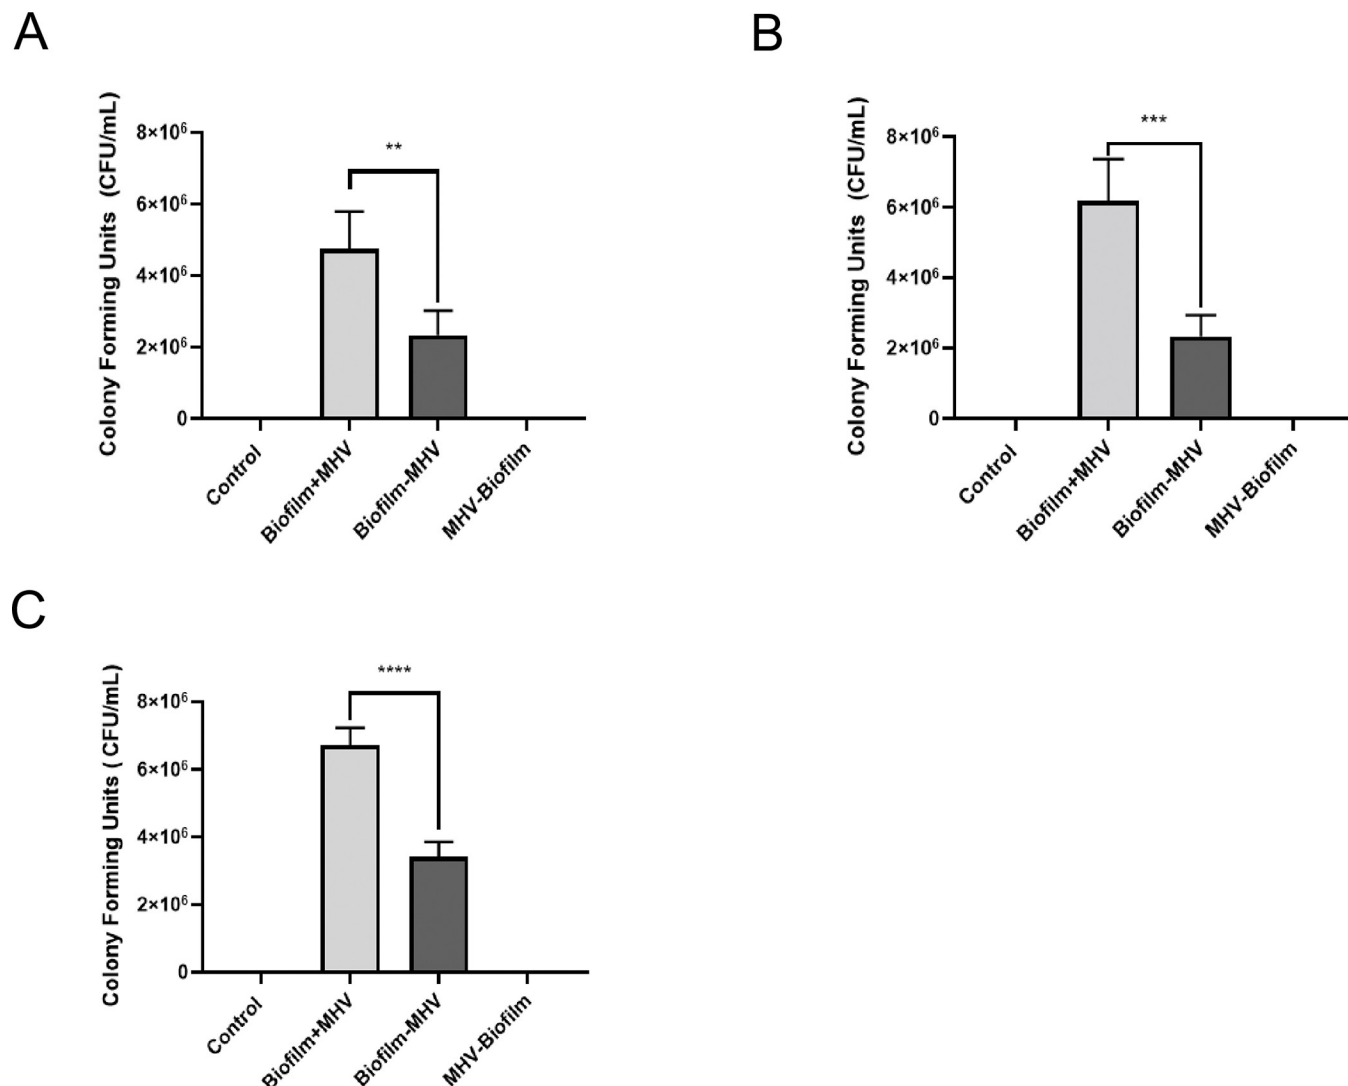

**Fig 1. CFU counts from biofilm + MHV and biofilm samples on stainless steel, PVC, and tile chips.** (A-C) CFU counts for biofilm + MHV and biofilm samples on (A) stainless steel, (B) PVC, and (C) ceramic tile chips. Each sample was plated in duplicate. Results in this figure are the mean values and standard deviations (error bars) from three independent experiments. Statistical significance was analyzed by unpaired t-test. \*\*:  $p < 0.01$ ; \*\*\*:  $p < 0.001$ ; \*\*\*\*:  $p < 0.0001$ .

<https://doi.org/10.1371/journal.pone.0286659.g001>

consisting of environmental microorganisms obtained from a meat processing plant drain, on sterile SS (Fig 1A), PVC (Fig 1B), and ceramic tile chips (Fig 1C) and let the samples incubate for five days at  $7^\circ\text{C}$  (Table 1). Bacteria recovered from the Biofilm-MHV on SS samples ranged from  $1.6$  to  $4.0 \times 10^6$  CFU/mL. In comparison, the Biofilm+MHV on SS numbers ranged from  $3.5$  to  $6.0 \times 10^6$  CFU/mL (Fig 1A, Table 1), therein the presence of the virus generating a 1.74-fold increase in the biovolume of the biofilm. The CFU numbers for Biofilm-MHV exposed to PVC ranged from  $1.8$  to  $4.0 \times 10^6$  CFU/mL, whereas the number recovered from the Biofilm+MHV on PVC ranged from  $5.0$  to  $7.8 \times 10^6$  CFU/mL (Fig 1B, Table 1), representing a 2.10-fold increase in biovolume when MHV was present. Likewise, the overall mean biofilm microbial cells recovered from the Biofilm-MHV on ceramic tile ranged from  $1.8$  to  $3.8 \times 10^6$  CFUs/mL, while Biofilm+MHV on ceramic tile ranged from  $4.8$  to  $7.0 \times 10^6$  CFUs/mL (Fig 1C, Table 1), representing a 2.11-fold increase in biovolume, and very similar to what was seen

**Table 1. Data from the biofilm +/- MHV CFU/mL count from different experimental conditions.** Table 1 indicates CFU/mL numbers and the percentage and fold change compared to the initial biofilm inoculum.

|              | CFU/mL for Biofilm + MHV on SS                                                           | CFU/mL for Biofilm + MHV on PVC                                                           | CFU/mL for Biofilm + MHV on Tile                                                         |
|--------------|------------------------------------------------------------------------------------------|-------------------------------------------------------------------------------------------|------------------------------------------------------------------------------------------|
| Control      | 0; 0                                                                                     | 0; 0                                                                                      | 0; 0                                                                                     |
| Biofilm +MHV | 5.25 x 10 <sup>6</sup> (+191.7%, 2.92-fold); 4.25 x 10 <sup>6</sup> (+49.1%, 1.49-fold). | 5.35 x 10 <sup>6</sup> (+189.2%, 2.89-fold); 7.00 x 10 <sup>6</sup> (+150.0%, 2.50-fold). | 6.50 x 10 <sup>6</sup> (+83.1%, 1.83-fold); 6.90 x 10 <sup>6</sup> (+112.3%, 2.12-fold). |
| Biofilm-MHV  | 1.80 x 10 <sup>6</sup> ; 2.85 x 10 <sup>6</sup>                                          | 1.85 x 10 <sup>6</sup> ; 2.80 x 10 <sup>6</sup>                                           | 3.55 x 10 <sup>6</sup> ; 3.25 x 10 <sup>6</sup>                                          |
| MHV-Biofilm  | 0; 0                                                                                     | 0; 0                                                                                      | 0; 0                                                                                     |

<https://doi.org/10.1371/journal.pone.0286659.t001>

with PVC. Therefore, our results indicate that MHV positively influences the growth of environmental microorganisms on SS, PVC, and on ceramic tiles.

### RNA recalcitrance on surfaces was less in the presence of biofilm

To determine whether there was a significant loss of intact MHV when incubated with an environmental biofilm on SS, PVC, and ceramic tile, we performed RT- qPCR analyses for the membrane gene (M) of MHV in our Biofilm + MHV, Biofilm-MHV, and MHV-Biofilm samples, as well as a negative control. Our RT-qPCR data revealed there was a statistically significant difference (unpaired T-test) in the persistence of viral RNA when a mixed species biofilm was present, compared with when the viral RNA was incubated on surfaces alone (Table 2). Specifically, the average gene copy numbers for the M-gene for Biofilm+MHV on SS was 5.60 gene copies/μL, compared with 6.21 gene copies/μL in the absence of biofilm (MHV-Biofilm, Fig 2A, Table 2). On PVC the average M-gene copy number for the Biofilm+MHV sample was 5.45 gene copies/μL, and 6.36 gene copies/μL for MHV-Biofilm (Fig 2B, Table 2), thus very similar to the trend we saw for SS. However, ceramic tile gave an average M-gene copy number for the Biofilm+MHV sample of 6.79 gene copies/μL, and MHV-Biofilm was 6.88 gene copies/μL (Fig 2C, Table 2). If we take each M-gene copy to equate to one virus/one plaque forming unit (PFU), our data indicate that 31.2–45.5% MHV was lost across all conditions when compared to the inoculum (100 μL at 1 x 10<sup>4</sup> PFU, thus 10 PFU/μL). However, there was an overall loss we observed that viral RNA was more significantly degraded when exposed to the environmental biofilms on SS and PVC, interestingly only a marginal reduction was observed on ceramic tile in the presence of biofilm, but this was still statically significant ( $p = 0.05$ ).

### MHV survival was significantly inhibited in the presence of biofilms on all surface materials

Although RT-qPCR analysis measures viral RNA presence in a quantitative fashion, it does not provide any information on the viral viability; therefore, to identify whether MHV was able to survive and remain infectious when incubated with an environmental biofilm, we performed plaque assays. For all of the materials tested, a significantly higher average of PFU/mL

**Table 2. Data from the biofilm +/- MHV RT-qPCR analyses on the recovered MHV RNA from the different experimental conditions.** Table 2 indicates CT numbers and the percentage and fold change from the initial inoculum (1.0 x 10<sup>3</sup>).

|              | N-gene CT # for Biofilm + MHV on SS                  | N-gene CT # for Biofilm + MHV on PVC                  | N-gene CT # for Biofilm + MHV on Tile               |
|--------------|------------------------------------------------------|-------------------------------------------------------|-----------------------------------------------------|
| Control      | 0; 0                                                 | 0; 0                                                  | 0; 0                                                |
| Biofilm +MHV | 14.27 (+3.9%, 1.04-fold); 16.47 (+11.7%, 1.12-fold). | 14.47 (+12.0%, 1.12-fold); 16.82 (+12.0%, 1.12-fold). | 24.23 (+2.8%, 1.03-fold); 19.87 (+1.5%, 1.02-fold). |
| Biofilm-MHV  | 0; 0                                                 | 0; 0                                                  | 0; 0                                                |
| MHV-Biofilm  | 13.73; 14.74                                         | 12.92; 15.02                                          | 23.57; 19.57                                        |

<https://doi.org/10.1371/journal.pone.0286659.t002>

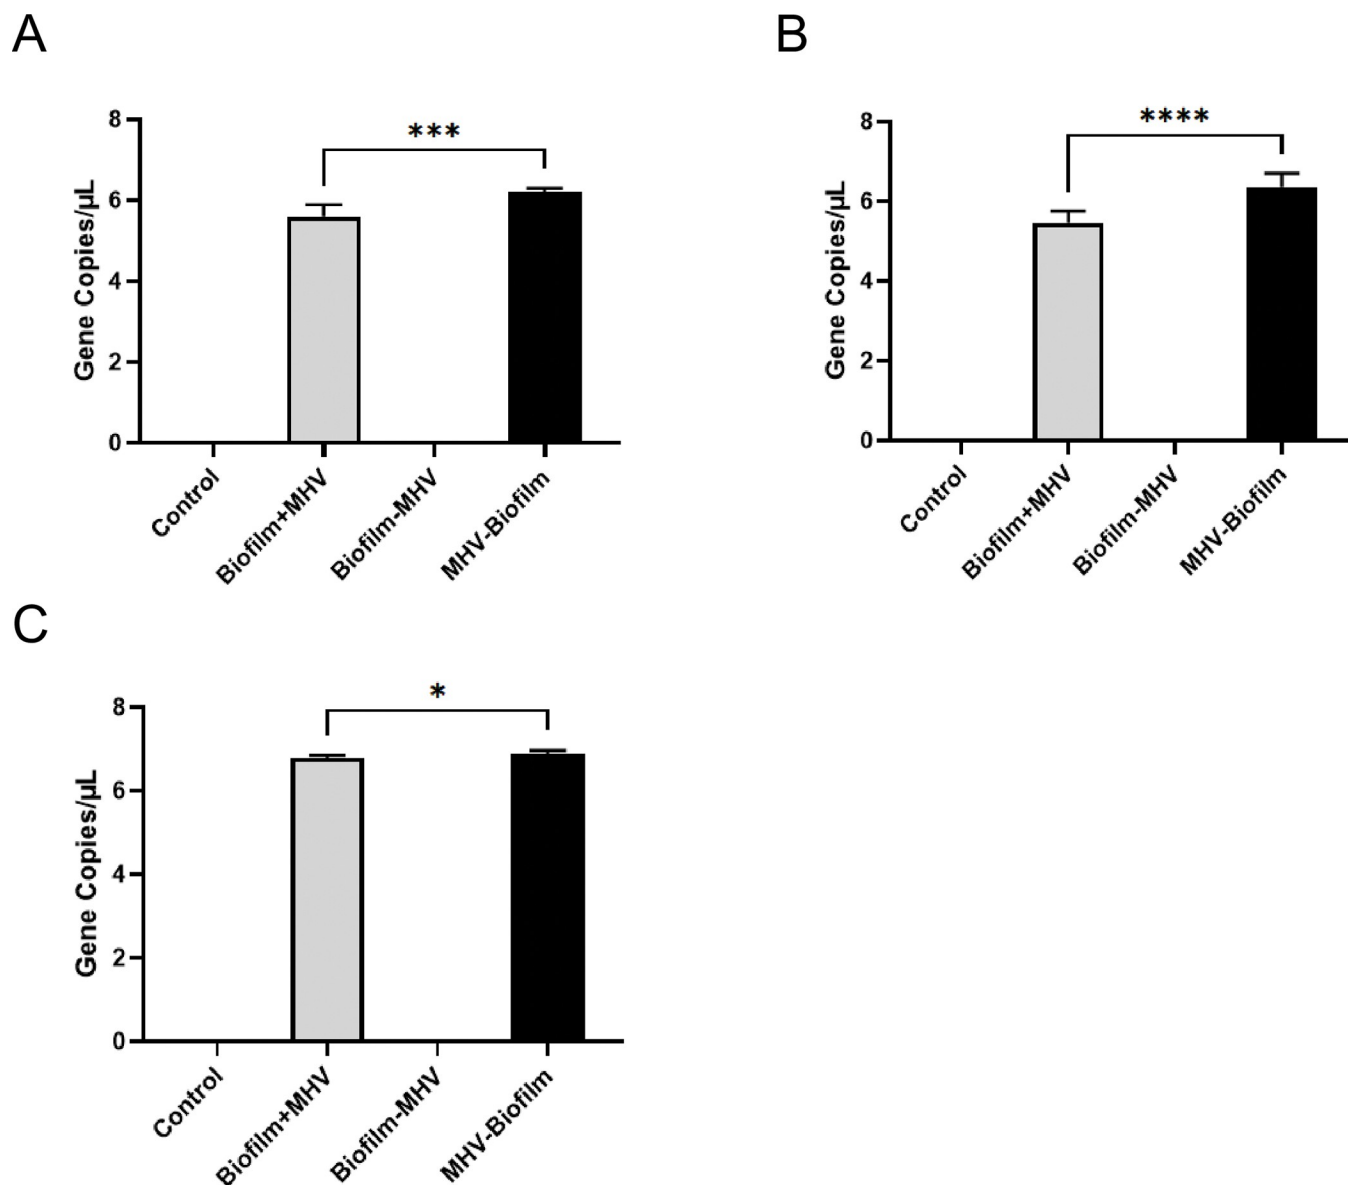

**Fig 2. qPCR analysis of MHV mixed with biofilm and pre-incubated for 5 days on stainless steel, PVC, and ceramic tile chips.** (A-C) qPCR analysis of MHV mixed with environmental biofilm on stainless steel, PVC and on tile chips.  $1.0 \times 10^3$  PFU of MHV were added to a SS, PVC, or ceramic tile chip along with a floor drain biofilm sample collected from the cooler of a single meat processing plant drain. The qPCR samples were analyzed in quadruplicate. Gene copy numbers were calculated from a standard curve of known quantities of MHV RNA in a 25  $\mu$ L qPCR reaction. Results in this figure are the mean values and standard deviations (error bars) from two independent experiments. Statistical significance was analyzed by unpaired t-test. ns: not significant; \*:  $p < 0.05$ ; \*\*\*:  $p < 0.001$ , \*\*\*\*:  $p < 0.0001$ .

<https://doi.org/10.1371/journal.pone.0286659.g002>

was detected in the absence of biofilm (Table 3), specifically Biofilm+MHV on SS chips gave 650 PFU/mL, compared with 4250 PFU/mL without (Fig 3A, Table 3), representing a 6.54-fold decrease in the presence of the biofilm. On the PVC test surface, the mean PFU/mL for Biofilm+MHV was 600 PFU/mL, compared with 5500 PFU/mL for MHV-Biofilm (Fig 3B, Table 3), equating to a 9.17-fold decrease. Similarly, Biofilm+MHV on ceramic tile gave 675 PFU/mL, whereas the average for MHV-Biofilm on ceramic tile was 6250 PFU/mL (Fig 3C, Table 3), a 9.26-fold difference and very similar to what was observed for PVC. These

**Table 3. Data from the plaque assay analysis on the recovered MHV viral particles incubated with biofilm.** Table 3 indicates PFU/mL numbers and the percentage and fold change from the initial inoculum ( $1.0 \times 10^3$  CFUs).

|              | PFU/mL for Biofilm + MHV on SS                                                    | PFU/mL for Biofilm + MHV on PVC                                                | PFU/mL for Biofilm + MHV on Tile                                                    |
|--------------|-----------------------------------------------------------------------------------|--------------------------------------------------------------------------------|-------------------------------------------------------------------------------------|
| Control      | 0; 0                                                                              | 0; 0                                                                           | 0; 0                                                                                |
| Biofilm +MHV | $7.50 \times 10^2$ (-566.7%, 6.67-fold); $5.50 \times 10^2$ (-536.4%, 6.36-fold). | $5.00 \times 10^2$ (-1200%, 13-fold); $7.00 \times 10^2$ (-542.9%, 6.43-fold). | $8.00 \times 10^2$ (-525.0%, 6.25-fold); $5.50 \times 10^2$ (-1263.6%, 13.64-fold). |
| Biofilm-MHV  | 0; 0                                                                              | 0; 0                                                                           | 0; 0                                                                                |
| MHV-Biofilm  | $5.00 \times 10^3$ ; $3.50 \times 10^3$                                           | $6.50 \times 10^3$ ; $4.50 \times 10^3$                                        | $5.00 \times 10^3$ ; $7.50 \times 10^3$                                             |

<https://doi.org/10.1371/journal.pone.0286659.t003>

observations suggest that infectivity/viability of MHV is drastically reduced in the presence of the environmental biofilm and reflect what was identified by RT-qPCR.

## Discussion

The National Cattlemen's Beef Association has predicted that the cattle industry will potentially experience a \$13.6 billion loss due to the novel coronavirus SARS-CoV-2, impacting ranchers across the USA [30]. Much of this loss stems from the rampant spreading of SARS-CoV-2 among plant workers, resulting in the closure of many meat processing plants [31–33]. This created a bottleneck in the supply chain between the livestock producers, feedlot operators and processors resulting in a breakdown in the USA's meat supply during 2020 and 2021 [34–36]. Additionally, the conditions within meat processing plants could be a conducive environment for SARS-CoV-2 to remain stable for a prolonged period of time (longer than five days). SARS-CoV-2 has been shown previously to remain stable for several days on stainless steel, copper, plastic, PVC and cardboard [23], which are commonly used materials throughout the farm-to-plate chain [24]. Our data confirmed that MHV shows a similar recalcitrance when tested on SS, PVC, and ceramic tiles. Meat processing plants are maintained at 4–7°C and SARS-CoV-2 virions are known to remain stable at colder temperatures [37, 38]; we demonstrated that MHV, which as a mammalian pathogen could be assumed to be strongly adapted to the host body temperature, was very stable on the test surfaces at 7°C for five days. Hence these data suggest that meat processing facilities are at a high risk of harboring and transmitting SARS-CoV-2.

In addition to meat processing facilities being a favorable environment for SARS-CoV-2 to persist and spread, these plants are also highly susceptible to biofilm growth [39–41]. Biofilms form in many different zones throughout food processing plants, including floors, drains, difficult to clean surfaces such as the back of the conveyor belts, and pipes [42, 43]. Often surfaces become hot spots for biofilm development due to poor accessibility for regular hygiene and sanitation maintenance [44]. Furthermore, nearly all biofilms in food processing environments consist of multiple species of microorganisms [43]. The complex interactions within the biofilm community significantly influence the architecture, activity, and sanitizer tolerance of the biofilm [41, 43, 45, 46]. Biofilms could potentially help SARS-CoV-2 spread throughout the meat processing facility and offer protection to the virus particles by either phagocytosing or endocytosing the virus particles that attach to the surface of the bacteria and protect them from being degraded by surface sanitizers used in the meat processing facility [20, 41, 47, 48]. Once the virus particles are inside of the bacteria, the bacteria could spread the virus throughout the meat processing facility through the water drainage system or from bacteria that are spread throughout the meat processing facility via the heating, ventilation, and air conditioning (HVAC) system [49–54].

In our study, we utilized MHV as a surrogate for SARS-CoV-2, as it has been shown to be an appropriate model for assessing methods and performance of SARS-CoV-2 but in a

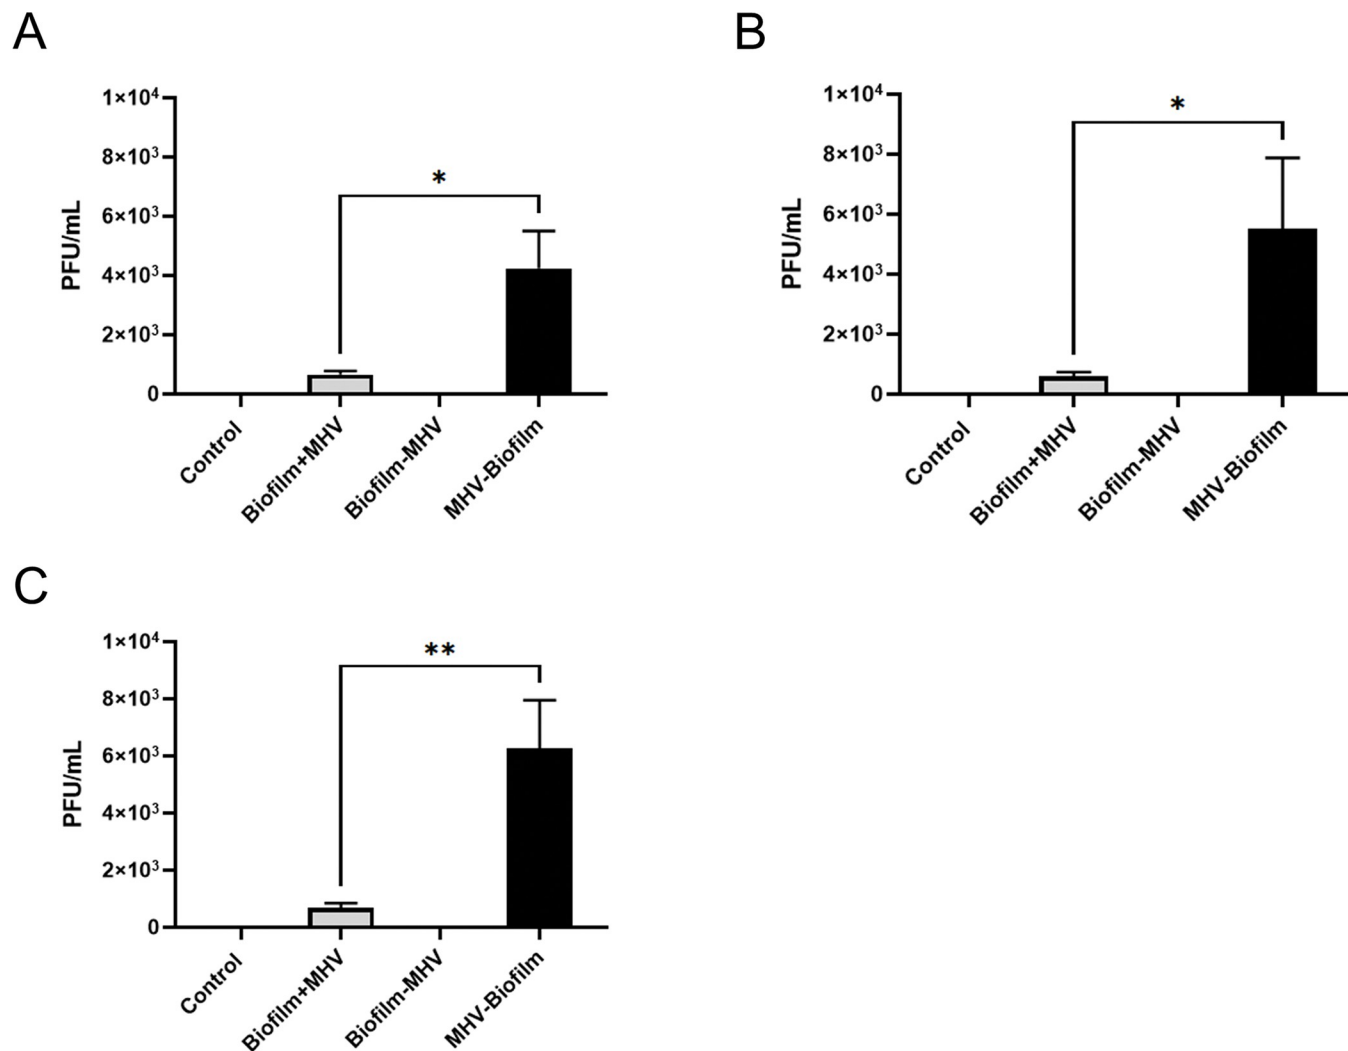

**Fig 3. Plaque assay results from biofilm + virus and virus samples on stainless steel, PVC, and ceramic tile chips.** (A-C) Results from plaque assays on samples collected from (A) stainless steel, (B) PVC, and (C) tile chips. Each sample was filtered through a 0.2  $\mu$ m filter and pipetted onto L2 cells in duplicate. Results in this figure are the mean values and standard deviations (error bars) from two independent experiments. Statistical significance was analyzed by unpaired t-test. \*:  $p < 0.05$ ; \*\*:  $p < 0.01$ .

<https://doi.org/10.1371/journal.pone.0286659.g003>

Biosafety Level 2 workspace [55]. Floor drain samples from a meat processing plant were used to epitomize the microbial community found in these settings. As floor drains collect all rinsing water and liquid wastes in the plant, the microbial communities from the floor drains have been considered to represent all microecological niches that encompass the various microorganisms within the processing plant environment [41, 45]. We investigated the survival rates of MHV on commonly used materials in the meat processing facilities: SS, PVC, and ceramic tiles. We observed that MHV was able to remain present and viable on all the materials tested but persistence was reduced in the presence of biofilm, as indicated by the plaque assays (Figs 2 & 3, Tables 2 & 3).

Despite there being several environmental parameters that could have facilitated the survival of MHV in the viral-environmental biofilm [23], plaque forming units (PFU/mL) and viral RNA, as measured by RT-qPCR, were both significantly reduced when MHV was exposed to an environmental biofilm compared to when MHV was inoculated on the materials



by itself (Fig 2, Table 2). When compared with the plaque assay data, our data indicates that the majority of the Biofilm+MHV signal from the RT-qPCR data was from non-viable/inactive virus. The PFU/mL recovered from virus incubated directly from the different materials, in the absence of biofilm, indicated a reduction of 37.5–57.5% of the initial infectious viral particles, however, from the biofilms, we observed approximately a 94% loss in infectivity. As virus is unable to replicate outside of a host cell we did not expect to observe numbers higher than the initial inoculum ( $1 \times 10^3$  PFUs) for our plaque assays, however, the reduction in numbers was stark in the presence of biofilm, in comparison to the numbers returned in the absence [56]. Nonetheless although we saw a large reduction in viral numbers in the presence of biofilm, we did observe MHV survival in all the test conditions, and given the highly infectious nature of SARS-CoV-2, particularly for some of the variant strains such as omicron, even a residual level remaining viable on surfaces represents a potential health hazard [56–58].

One of the most interesting observations from this study was an increase in biofilm biovolume in the presence of MHV ranging from a 1.74–2.11-fold increase (Fig 1, Table 1). This result is in concordance with the findings from other work on biofilms, where virus particles also enhanced the biovolume of the biofilm [25, 59–61]. In nature, microbial communities survive as mixed-species communities with complex interactions with eukaryotes and prokaryotes living in a complex biofilm web [20, 22, 62]. The increase in biovolume could be due to the triggering of a defense mechanism due to the biofilm identifying the presence of a foreign substance and reacting by increasing its biovolume to try and spread out and obtain as many resources as possible (Fig 1). Therefore, this finding is critical in deciphering the role of viral interactions with biofilms in harboring the virus particles. We tested viral viability on surfaces with and without biofilms but without the inclusion of any disinfectant; in a real-life situation, it could well be that virus persistence on surfaces would be lower than in biofilms when disinfectants were included. Previous studies have indicated that biofilms may provide a physical barrier protecting the antimicrobial agent from coming into contact with the virus particles [22, 26]. Given the impact of SARS-CoV-2 on meat processing facilities, it is vital to understand the role that the biofilm is serving in protecting and harboring the virus.

From our viability studies with biofilm and virus, we observed that MHV was able to remain infectious when mixed with an environmental biofilm on SS, PVC, or on ceramic tile (Fig 3, Table 3), but was considerably more infectious when incubated on these same surfaces without biofilm [18]. Higher numbers of MHV were recovered from PVC and ceramic tile than on SS. These results could be due to the slick surfaces of the PVC and ceramic tile which potentially could allow for better removal of the virus following incubation, in comparison to the SS which has a rough surface [18, 51, 63]. The infectivity of MHV when mixed with the environmental biofilm was approximately the same between SS, PVC, and ceramic tile, but we observed a significant loss in infectivity for MHV overall following exposure to biofilm. This could be due to some of the virus being incorporated as a part of the biofilm, and therefore, would have been removed from the filtrate when each sample was filtered prior to the plaque assay. Another potential reason is that the biofilm contains exogenous proteases and nucleases which result in a degradation of the viral particles, leaving residual RNA fragments which are measurable by qPCR, which fits with the data we observed. Further work using long-read based NGS technology to sequence the entire biofilm would provide further information on the integrity of the viral RNA within the biofilm.

These data suggest that SARS-CoV-2 could easily remain viable on the materials tested, which are commonly found in meat processing (SS, PVC, and ceramic tile) for many days. Microbial biofilms could be considered as potential reservoirs of pathogenic viruses, indeed, they are probably responsible for numerous persistent viral infections [22]. Although we observed increased viral viability in the absence of biofilm, there is the potential that viral



particles could travel through that liquids that seep through the drains in these facilities and survive along with the environmental biofilms found in the drains, where the biofilm matrix would provide a physical barrier protecting the SARS-CoV-2 particles from sanitizers, which has been previously observed for other viruses [64, 65]. Microbial communities in the biofilm could also enhance the dispersal of viruses through several active processes: viruses can bind to flagellated bacteria and be transported over relatively large distances by bacterial motility [26, 66]. Even without binding to the virus, bacteria can generate strong physical forces that result in mixing of surrounding fluids [21, 62], thus bacteria can colonize new areas by continuously producing new extracellular matrix (ECM) and actively swarming outwards, creating a drag and moving the virus too [41, 45]. These two bacterial mechanisms could create new locations throughout the meat-processing facility which can harbor SARS-CoV-2.

SARS-CoV-2 is well documented to spread through aerosols [13, 23]. One common process in meat processing facilities involves washing the floors with pressurized water, this results in a huge release of aerosolized particles, and if SARS-CoV-2 is present this will become aerosolized too. Once the virus is airborne, the colder temperature and the airflow from HVAC systems in the meat processing facility will facilitate the survival and spread of SARS-CoV-2 throughout the plant, in agreement with recent fluid mechanics simulations [67].

The above findings lead us to conclude that both the recalcitrance of coronaviruses on surfaces, the documented survival at low temperatures, the presence of multi-species biofilms, and HVAC systems moving aerosols could all come together to play a significant indication for the higher rates of COVID-19 cases in meat processing facilities. Due to the nature of the work, it is difficult to implement workplace physical distancing. This, on top of other factors recognized among meat processing frontline workers such as crowded living and transportation conditions [68] have all converged to create a quagmire where SARS-CoV-2 is rapidly transmitted. Continued studies on SARS-CoV-2 in meat processing plants will help provide new information on how we understand the relationship between viruses, bacteria, and fungi. This knowledge will help design new engineering and workflow strategies for inhibiting future outbreaks of SARS-CoV-2 and other pathogens within these facilities.

## Conclusions

Our data provides evidence that MHV (which was adopted as a surrogate for SARS-CoV-2) can persist for up to five days post-inoculation under the environmental conditions (temperatures and surfaces) typically found in meat processing plants. Although we observed a lower survival rate from MHV in biofilms, compared to on surfaces alone, our results suggest that environmental multi-species biofilms from meat processing plants can harbor viral particles, potentially protecting the virus from sanitizers and facilitating a reservoir for SARS-CoV-2 to persist and periodically disperse throughout the meat processing facility. We also observed that biofilms were stimulated by MHV, and this resulted in an increase in biovolume. Further studies will be required to decipher the molecular mechanisms of viral:biofilm interactions, both from the perspective of viral protection and survival, but also from the bacterial sensing and reacting to the virus side. Together, this knowledge will help in designing targeted prevention strategies to eradicate the harborage and spread of viral lodged multi-species biofilms.

## Materials and methods

### Drain sample collection and characterization

Meat processing floor drain biofilms were collected following the previously described protocol [41] and were generously provided for this study by Drs. Mick Bosilivac and Rong Wang USDA-ARS-USMARC, Clay Center, Nebraska. The biofilm used in this study was collected

from a floor drain from the cooler of a single meat processing facility. The biofilm used in this study consisted of the following dominant taxa of Flavobacteriaceae, Moraxellaceae, Listeriaceae, Pseudomonaceae, Enterobacteriaceae, Weeksellaceae, Sphingobacteriaceae, and Aeromonadaceae [41].

### Cell lines and MHV propagation

MHV strain A59 (ATCC® VR-764) was used for all of the experiments in this study as a BSL-2 surrogate model to study SARS-CoV-2 persistence in meat processing plants. L2 cells (ATCC® CCL-149TM) were used for MHV plaque assay. In addition, the mouse astrocytoma-derived cell line (DBT), was used to propagate MHV (generously provided by Dr. Julian Leibowitz, Texas A&M Health Science Center, College Station, TX). All cells used in this study were cultured at 37°C in 5% CO<sub>2</sub> in T-175-cm<sup>2</sup> ventilated-cap flasks with 25 mL of Dulbecco's modified Eagle medium (DMEM; Cellgro) supplemented with 10% fetal bovine serum (FBS), penicillin (50 IU/mL), and streptomycin (50 µg/mL).

The virus stocks used for this study were produced as previously described [69], with the addition of 1% Penicillin/Streptomycin. Specifically, MHV stocks were produced by seeding  $1.5 \times 10^7$  DBT cells in four T-175-cm<sup>2</sup> ventilated-cap flasks with 25 mL of D10 media (DMEM +10% FBS and 1% Penicillin/Streptomycin mixture) in each flask and incubated for 24 hours at 37°C with 5% CO<sub>2</sub>. After the 24 hour-incubation period, each flask was inoculated with MHV to produce a multiplicity of infection (MOI) between 0.1 and 0.001 PFU/cell, and incubated for 24 hours at 37°C with 5% CO<sub>2</sub>. Following incubation, the flask was frozen at -80°C for at least one hour to help dislodge the cells from the flask. The flasks were then thawed and the cell suspension transferred into a 15-mL polypropylene screw-cap tube, and sonicated on ice in a cup sonicator at 100 W with three bursts of 20 seconds, resting on ice for 20 seconds between each burst. The cells were collected by centrifuging the tube for 10 minutes at 3000 RPM at 4°C, and the virus stock aliquoted into 0.5-mL portions in 1 mL screw-cap freezer tubes and stored at -80°C. One aliquot of the virus was used to determine the titer of the virus via plaque assay.

### Assay of MHV infectivity

The viral infectivity for each virus was determined by titrating each virus stock onto cultured L2 cells and a solid double overlay plaque assay was performed as previously described [70]. The MHV viral titer used for all experiments was  $1.0 \times 10^4$  PFU/mL, and 100 µL ( $1 \times 10^3$  viral particles) were used for each sample tested.

### Biofilm formation with drain sample bacteria and MHV

Floor drain samples were pre-cultured by inoculating 1:50 into Lennox Broth without salt medium (LB-NS, Acumedia Manufacturers, Baltimore, MD) and incubated at 7°C for five days with orbital shaking at 200 rpm [41]. On the fifth day, a 1.0 mL aliquot was removed from each sample, diluted in sterile LB-NS medium, and plated onto Trypticase soy agar (TSA) plates for colony enumeration after overnight incubation at 37°C. To investigate whether biofilms formed from floor drain samples can support the harborage of MHV, biofilms were developed with or without MHV on SS, PVC, and ceramic tile (Fig 4). Controls were included on all the test surfaces. These were MHV alone (no biofilm) and a media only negative control. The experiments were set-up in duplicate in 6-well tissue culture plates. Each well contained one sterile (18X18X2 mm) SS, PVC, or ceramic tile chip. The following test combinations were added to the top facing surface of the chip: (A) Biofilm+MHV: contained 100 µL of the five-day floor drain pre-culture (described above) mixed with 100 µL of MHV in DMEM and

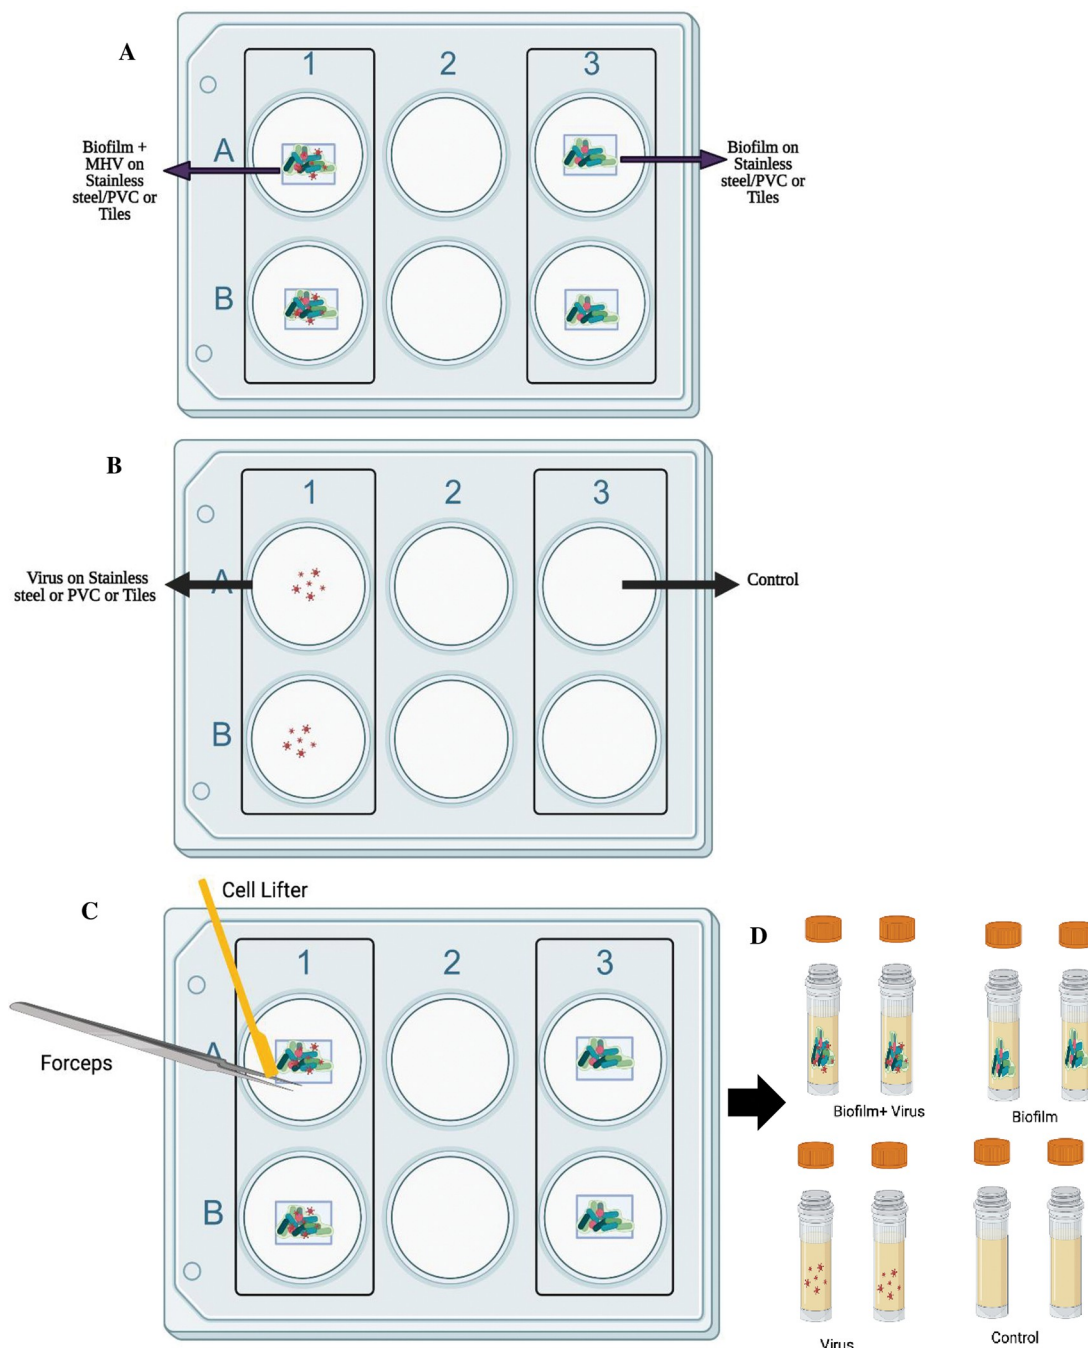

**Fig 4. Schematic representation of floor drain biofilm and virus experiment.** (A and B): Experimental set up with Biofilm + Virus, Biofilm, Virus, and Negative Control in duplicate. The experimental set is incubated at 7°C for 5 days. (C). After 5 days, the biofilm was harvested from SS, PVC, or tile chips using a cell lifter and forceps and rinsed with 1 mL of LB-NS. (D) Harvested cells were stored in a screw-cap tube at -80°C until assayed.

<https://doi.org/10.1371/journal.pone.0286659.g004>

100 µL of LB-NS media; (B) Biofilm-MHV contained 100 µL of the five-day biofilm pre-culture, 100 µL of DMEM, and 100 µL of LB-NS media; (C) MHV alone comprised of: 100 µL of MHV ( $1 \times 10^3$ ) in DMEM and 200 µL of LB-NS media; (D) Media only control (Negative Control) was: 100 µL of DMEM and 200 µL of LB-NS. Each experimental variable was incubated at

7°C for five days. At the end of the incubation period, biofilm biomass/virus was harvested from each chip by lifting the chip with sterile forceps, scraping the material on both sides with a sterile cell scraper into a sterile tube and rinsing the chip with 1 mL of LB-NS, which was also collected (Fig 4). The collected sample was homogenized by pipetting. The drain biofilm biomass was determined by taking 100 µL of the homogenate, performing 10-fold dilutions into LB-NS and plating on TSA plates for colony enumeration following an overnight incubation at 37°C. The remaining homogenate was used for qPCR and plaque assay analysis. Results from this experiment are the mean values and standard deviations (error bars) from two independent experiments.

### MHV RT-qPCR analysis

Viral RNA from each sample was extracted and purified to perform RT-qPCR to determine the relative copy numbers of MHV in each sample. Viral RNA was extracted using NEB's Monarch Total RNA Miniprep Kit and following the Tough-to-Lyse manufacturer's protocol. Purified RNA samples were quantified by using a Thermo Fisher Scientific ND-1000 spectrophotometer. Purified RNA samples were stored at -20°C. Taqman-based RT-qPCR analysis was carried out using NEB's Luna<sup>®</sup> Universal Probe One-Step RT-qPCR kit. Purified RNA extracted from MHV was used for the positive control and to create a standard curve. The RT-qPCR reactions were completed in 25 µL volumes using the Luna Universal Probe One-Step Reaction Mix. The RT-qPCR mixture contained 10 µL of Luna Universal Probe One-Step Reaction Mix, 1 µL of Luna WarmStart RT Enzyme Mix, 400 nM of forward primer (5' -GGA ACTTCTCGTTGGGCATTATACT-3'), 400 nM of reverse primer (5' - ACCACAAGATTAT CATTTCACAACATA-3'), 200 nM of probe (IDT) (5' -FAM- ACATGCTAC-ZEN-GG CTCGTGTAACCGAACTGT-3'IABkFQ-3'), 250 ng RNA, and nuclease free water [71]. The RT-qPCR analysis was performed using a Bio-Rad CFX96 Deep Well Real Time thermal cycler. Reverse transcription occurred at 55°C for 10 minutes, after which there was a denaturation and *Taq* polymerase activation step at 95°C for 1 minute, and then 40 cycles at 95°C for 15 seconds followed by 60°C for 30 seconds for data collection. RT-qPCR reactions were performed in quadruplicate for each sample and the sample threshold cycle (CT) was used for data analysis. Gene copy numbers were calculated by comparing the CT value for 250 ng of MHV on the standard curve with the CT value for each sample. The following equation was used to calculate the gene copy numbers: Gene Copy Number = (Copy Number of 250 ng of positive control) - ((CT Pos Cont. - CT exp cont)/CT exp cont) \* (Copy number of 250 ng of positive control) [72]. Data for each sample was compared using positive and negative controls performed in duplicate. Results from this experiment are the mean value and standard deviation (error bars) from two independent experiments.

### Plaque assay analysis

Plaque assays were performed to determine MHV infectivity/viability. 300 µL of each recovered sample homogenate was filtered through a 0.2 µm syringe filter, to remove bacterial contaminants, before being serially diluted in DMEM with 2% FBS and 1% Streptomycin/ Penicillin mix. Each sample was plated in duplicate. Results from this experiment were obtained from two independent experiments (biological replicates). A previously published protocol was followed for the double layer overlay plaque assay [72].

### Supporting information

**S1 Data.**  
(XLSX)

**S2 Data.**

(XLSX)

**Acknowledgments**

We would like to thank Drs. Mick Bosilivac and Rong Wang (USDA-ARS-UAMRC, Clay Center-Nebraska) for providing meat processing plant biofilms, Dr. Julien Leibowitz (Texas A&M) for providing the original stocks of MHV and DBT cells.

**Author Contributions**

**Conceptualization:** Amanda Claire Brown, Sapna Chitlapilly Dass.

**Data curation:** Austin Featherstone.

**Formal analysis:** Amanda Claire Brown, Sapna Chitlapilly Dass.

**Funding acquisition:** Amanda Claire Brown, Sapna Chitlapilly Dass.

**Investigation:** Sapna Chitlapilly Dass.

**Methodology:** Sapna Chitlapilly Dass.

**Project administration:** Sapna Chitlapilly Dass.

**Supervision:** Sapna Chitlapilly Dass.

**Visualization:** Austin Featherstone, Amanda Claire Brown.

**Writing – original draft:** Austin Featherstone.

**Writing – review & editing:** Amanda Claire Brown, Sapna Chitlapilly Dass.

**References**

1. V'kovski P, Kratzel A, Steiner S, Stalder H, Thiel V. Coronavirus biology and replication: implications for SARS-CoV-2. *Nat Rev Microbiol*. [cited 6 May 2021]. <https://doi.org/10.1038/s41579-020-00468-6>
2. House NNC, Palissery S, Sebastian H. Corona Viruses: A Review on SARS, MERS and COVID-19. 2021; 14: 117863612110024. <https://doi.org/10.1177/11786361211002481> PMID: 33795938
3. Vlasova AN, Diaz A, Dantia D, Xiu L, Toh TH, Lee JSY, et al. Novel Canine Coronavirus Isolated from a Hospitalized Patient With Pneumonia in East Malaysia. *Clin Infect Dis*. 2022; 74: 446–454. <https://doi.org/10.1093/cid/ciab456> PMID: 34013321
4. Lednicky JA, Tagliamonte MS, White SK, Elbadry MA, Alam MM, Stephenson CJ, et al. Emergence of porcine delta-coronavirus pathogenic infections among children in Haiti through independent zoonoses and convergent evolution. *medRxiv Prepr Serv Heal Sci*. 2021 [cited 13 Oct 2022]. <https://doi.org/10.1101/2021.03.19.21253391> PMID: 33791709
5. Holmes EC, Goldstein SA, Rasmussen AL, Robertson DL, Crits-Christoph A, Wertheim JO, et al. The origins of SARS-CoV-2: A critical review. *Cell*. 2021; 184: 4848–4856. <https://doi.org/10.1016/j.cell.2021.08.017> PMID: 34480864
6. Gong S ran, Bao L lin. The battle against SARS and MERS coronaviruses: Reservoirs and Animal Models. *Anim Model Exp Med*. 2018; 1: 125. <https://doi.org/10.1002/ame2.12017> PMID: 30891557
7. Ghai RR, Carpenter A, Liew AY, Martin KB, Herring MK, Gerber SI, et al. Animal Reservoirs and Hosts for Emerging Alphacoronaviruses and Betacoronaviruses. *Emerg Infect Dis*. 2021; 27: 1015. <https://doi.org/10.3201/eid2704.203945> PMID: 33770472
8. Singh D, Yi S V. On the origin and evolution of SARS-CoV-2. *Exp Mol Med* 2021; 53: 537–547. <https://doi.org/10.1038/s12276-021-00604-z> PMID: 33864026
9. Abdelrahman Z, Li M, Wang X. Comparative Review of SARS-CoV-2, SARS-CoV, MERS-CoV, and Influenza A Respiratory Viruses. *Front Immunol*. 2020; 11: 2309. <https://doi.org/10.3389/fimmu.2020.552909> PMID: 33013925



10. Zhu Z, Lian X, Su X, Wu W, Marraro GA, Zeng Y. From SARS and MERS to COVID-19: A brief summary and comparison of severe acute respiratory infections caused by three highly pathogenic human coronaviruses. *Respir Res.* 2020; 21: 1–14. <https://doi.org/10.1186/S12931-020-01479-W/TABLES/4>
11. Cucinotta D, Vanelli M. WHO Declares COVID-19 a Pandemic. *Acta Biomed.* 2020; 91: 157–160. <https://doi.org/10.23750/abm.v91i1.9397> PMID: 32191675
12. Sanche S, Lin YT, Xu C, Romero-Severson E, Hengartner N, Ke R. High Contagiousness and Rapid Spread of Severe Acute Respiratory Syndrome Coronavirus 2—Volume 26, Number 7—July 2020—Emerging Infectious Diseases journal—CDC. *Emerg Infect Dis.* 2020; 26: 1470–1477. <https://doi.org/10.3201/EID2607.200282> PMID: 32255761
13. Bar-On YM, Flamholz A, Phillips R, Milo R. Sars-cov-2 (Covid-19) by the numbers. *Elife.* 2020; 9. <https://doi.org/10.7554/eLife.57309> PMID: 32228860
14. Bartik AW, Bertrand M, Cullen Z, Glaeser EL, Luca M, Stanton C. The impact of COVID-19 on small business outcomes and expectations. *Proc Natl Acad Sci U S A.* 2020; 117: 17656–17666. <https://doi.org/10.1073/pnas.2006991117> PMID: 32651281
15. Bongaerts D, Mazzola F, Wagner W. Closed for business: The mortality impact of business closures during the Covid-19 pandemic. *PLoS One.* 2021; 16: e0251373. <https://doi.org/10.1371/journal.pone.0251373> PMID: 33989322
16. Douglas L. Nearly 90% of big US meat plants had COVID-19 cases in pandemic's first year—data. In: Reuters [Internet]. 2022 [cited 1 Mar 2022]. Available: <https://www.reuters.com/business/nearly-90-big-us-meat-plants-had-covid-19-cases-pandemics-first-year-data-2022-01-14/>
17. Sauer K, Stoodley P, Goeres DM, Hall-Stoodley L, Burmølle M, Stewart PS, et al. The biofilm life cycle: expanding the conceptual model of biofilm formation. *Nat Rev Microbiol* 2022 2010. 2022; 20: 608–620. <https://doi.org/10.1038/s41579-022-00767-0> PMID: 35922483
18. Chitlapilly Dass S, Wang R. Biofilm through the Looking Glass: A Microbial Food Safety Perspective. *Pathog (Basel, Switzerland).* 2022; 11: 346. <https://doi.org/10.3390/PATHOGENS11030346> PMID: 35335670
19. Pinto M, Langer TM, Hüffer T, Hofmann T, Herndl GJ. The composition of bacterial communities associated with plastic biofilms differs between different polymers and stages of biofilm succession. *PLoS One.* 2019; 14: e0217165. <https://doi.org/10.1371/journal.pone.0217165> PMID: 31166981
20. Zupančič J, Raghupathi PK, Houf K, Burmølle M, Sørensen SJ, Gunde-Cimerman N. Synergistic interactions in microbial biofilms facilitate the establishment of opportunistic pathogenic fungi in household dishwashers. *Front Microbiol.* 2018; 9: 21. <https://doi.org/10.3389/fmicb.2018.00021> PMID: 29441043
21. Quignon F, Sardin M, Kiene L, Schwartzbrod L. Poliovirus-1 inactivation and interaction with biofilm: a pilot-scale study. *Appl Environ Microbiol.* 1997; 63: 978–982. <https://doi.org/10.1128/aem.63.3.978-982.1997> PMID: 14692421
22. Von Borowski RG, Trentin DS. Biofilms and Coronavirus Reservoirs: a Perspective Review. *Appl Environ Microbiol.* 2021; 87: 1–14. <https://doi.org/10.1128/AEM.00859-21> PMID: 34190608
23. van Doremalen N, Bushmaker T, Morris DH, Holbrook MG, Gamble A, Williamson BN, et al. Aerosol and Surface Stability of SARS-CoV-2 as Compared with SARS-CoV-1. *N Engl J Med.* 2020; 382: 1564–1567. <https://doi.org/10.1056/NEJMc2004973> PMID: 32182409
24. Aboubakr HA, Sharafeldin TA, Goyal SM. Stability of SARS-CoV-2 and other coronaviruses in the environment and on common touch surfaces and the influence of climatic conditions: A review. *Transbound Emerg Dis.* 2021; 68: 296–312. <https://doi.org/10.1111/tbed.13707> PMID: 32603505
25. Neu U, Mainou BA. Virus interactions with bacteria: Partners in the infectious dance. *PLOS Pathog.* 2020; 16: e1008234. <https://doi.org/10.1371/journal.ppat.1008234> PMID: 32045465
26. Hendricks MR, Lashua LP, Fischer DK, Flitter BA, Eichinger KM, Durbin JE, et al. Respiratory syncytial virus infection enhances *Pseudomonas aeruginosa* biofilm growth through dysregulation of nutritional immunity. *Proc Natl Acad Sci U S A.* 2016; 113: 1642–1647. <https://doi.org/10.1073/pnas.1516979113> PMID: 26729873
27. Kalantar-Zadeh K, Ward SA, Kalantar-Zadeh K, El-Omar EM. Considering the Effects of Microbiome and Diet on SARS-CoV-2 Infection: Nanotechnology Roles. *ACS Nano.* 2020; 14: 5179–5182. <https://doi.org/10.1021/acsnano.0c03402> PMID: 32356654
28. Guven-Maiorov E, Hakouz A, Valjevac S, Keskin O, Tsai CJ, Gursoy A, et al. HMI-PRED: A Web Server for Structural Prediction of Host-Microbe Interactions Based on Interface Mimicry. *J Mol Biol.* 2020; 432: 3395. <https://doi.org/10.1016/j.jmb.2020.01.025> PMID: 32061934
29. Otter JA, Donskey C, Yezli S, Douthwaite S, Goldenberg SD, Weber DJ. Transmission of SARS and MERS coronaviruses and influenza virus in healthcare settings: the possible role of dry surface contamination. *J Hosp Infect.* 2016; 92: 235. <https://doi.org/10.1016/j.jhin.2015.08.027> PMID: 26597631



30. Kristin. Coronavirus-related cattle industry losses estimated at \$13.6 billion—Texas and Southwestern Cattle Raisers Association. In: Texas and Southwestern Cattle Raisers Association [Internet]. 2020 [cited 19 Nov 2021]. Available: <https://tscra.org/coronavirus-related-cattle-industry-losses-estimated-at-13-6-billion/>
31. Corkery M, Yaffe-Bellany D. The Food Chain's Weakest Link: Slaughterhouses—The New York Times. In: The New York Times [Internet]. 2020 [cited 19 Nov 2021]. Available: <https://www.nytimes.com/2020/04/18/business/coronavirus-meat-slaughterhouses.html>
32. Taylor CA, Boulos C, Almond D. Livestock plants and COVID-19 transmission. *Proc Natl Acad Sci U S A*. 2020; 117: 31706–31715. <https://doi.org/10.1073/pnas.2010115117> PMID: 33214147
33. Saitone TL, Aleks Schaefer K, Scheitrum DP. COVID-19 morbidity and mortality in U.S. meatpacking counties. *Food Policy*. 2021; 101: 102072. <https://doi.org/10.1016/j.foodpol.2021.102072> PMID: 33846663
34. Hashem NM, González-Bulnes A, Rodríguez-Morales AJ. Animal Welfare and Livestock Supply Chain Sustainability Under the COVID-19 Outbreak: An Overview. *Front Vet Sci*. 2020; 7: 679. <https://doi.org/10.3389/fvets.2020.582528> PMID: 33195601
35. Ijaz M, Yar MK, Badar IH, Ali S, Islam MS, Jaspal MH, et al. Meat Production and Supply Chain Under COVID-19 Scenario: Current Trends and Future Prospects. *Front Vet Sci*. 2021; 8: 432. <https://doi.org/10.3389/fvets.2021.660736> PMID: 34026895
36. Krumel TP, Goodrich C. COVID-19 Working Paper: Meatpacking Working Conditions and the Spread of COVID-19. In: United States Department of Agriculture [Internet]. 2021 [cited 21 Jan 2022]. Available: <https://www.ers.usda.gov/publications/pub-details/?pubid=102205>
37. Dhakal J, Jia M, Joyce JD, Moore GA, Ovissipour R, Bertke AS. Survival of Severe Acute Respiratory Syndrome Coronavirus 2 (SARS-CoV-2) and Herpes Simplex Virus 1 (HSV-1) on Foods Stored at Refrigerated Temperature. *Foods*. 2021; 10: 1005. <https://doi.org/10.3390/foods10051005> PMID: 34064494
38. Jia M, Taylor TM, Senger SM, Ovissipour R, Bertke AS. SARS-CoV-2 Remains Infectious on Refrigerated Deli Food, Meats, and Fresh Produce for up to 21 Days. *Foods*. 2022; 11: 286. <https://doi.org/10.3390/foods11030286> PMID: 35159438
39. Nikolaev Y, Yushina Y, Mardanov A, Gruzdev E, Tikhonova E, El-Registan G, et al. Microbial Biofilms at Meat-Processing Plant as Possible Places of Bacteria Survival. *Microorganisms*. 2022; 10. <https://doi.org/10.3390/MICROORGANISMS10081583> PMID: 36014001
40. Carrascosa C, Raheem D, Ramos F, Saraiva A, Raposo A. Microbial Biofilms in the Food Industry—A Comprehensive Review. *Int J Environ Res Public Health*. 2021; 18: 1–31. <https://doi.org/10.3390/ijerph18042014> PMID: 33669645
41. Chittapilly Dass S, Bosilevac JM, Weinroth M, Elowsky CG, Zhou Y, Anandappa A, et al. Impact of mixed biofilm formation with environmental microorganisms on *E. coli* O157:H7 survival against sanitization. *npj Sci Food*. 2020; 4: 16. <https://doi.org/10.1038/s41538-020-00076-x> PMID: 33083548
42. Sofos JN, Geornaras I. Overview of current meat hygiene and safety risks and summary of recent studies on biofilms, and control of *Escherichia coli* O157:H7 in nonintact, and *Listeria monocytogenes* in ready-to-eat, meat products. *Meat Sci*. 2010; 86: 2–14. <https://doi.org/10.1016/j.meatsci.2010.04.015> PMID: 20510532
43. Wang R. Biofilms and Meat Safety: A Mini-Review. *J Food Prot*. 2019; 82: 120–127. <https://doi.org/10.4315/0362-028X.JFP-18-311> PMID: 30702946
44. Mathijssen AJTM Shendruk TN, Yeomans JM, Doostmohammadi A. Upstream Swimming in Microbiological Flows. *Phys Rev Lett*. 2016; 116: 028104. <https://doi.org/10.1103/PHYSREVIEWLTT.116.028104/FIGURES/4/MEDIUM>
45. Dass S, Wang B, Stratton J, Bianchini A, Ababdappa A. Food processing environment surveillance using amplicon metagenomics: Assessing the change in the microbiome of a fluid milk processing facility before and after cleaning. *Fac Publ Food Sci Technol*. 2018 [cited 18 Feb 2022]. Available: <https://digitalcommons.unl.edu/foodsciefacpub/289>
46. Chittapilly Dass S, Abu-Ghannam N, Antony-Babu S, J. Cummins E. Ecology and molecular typing of *L. monocytogenes* in a processing plant for cold-smoked salmon in the Republic of Ireland. *Food Res Int*. 2010; 43: 1529–1536. <https://doi.org/10.1016/J.FOODRES.2010.04.030>
47. Zalar P, Novak M, De Hoog GS, Gunde-Cimerman N. Dishwashers—A man-made ecological niche accommodating human opportunistic fungal pathogens. *Fungal Biol*. 2011; 115: 997–1007. <https://doi.org/10.1016/j.funbio.2011.04.007> PMID: 21944212
48. Zupančič J, Babič MN, Zalar P, Gunde-Cimerman N. The Black Yeast *Exophiala dermatitidis* and Other Selected Opportunistic Human Fungal Pathogens Spread from Dishwashers to Kitchens. *PLoS One*. 2016; 11: e0148166. <https://doi.org/10.1371/journal.pone.0148166> PMID: 26867131

49. Sobolik JS, Sajewski ET, Jaykus LA, Cooper DK, Lopman BA, Kraay ANM, et al. Decontamination of SARS-CoV-2 from cold-chain food packaging provides no marginal benefit in risk reduction to food workers. *Food Control*. 2022; 136: 108845. <https://doi.org/10.1016/j.foodcont.2022.108845> PMID: 35075333
50. Nakanishi EY, Palacios JH, Godbout S, Fournel S. Interaction between Biofilm Formation, Surface Material and Cleanability Considering Different Materials Used in Pig Facilities—An Overview. *Sustain* 2021, Vol 13, Page 5836. 2021; 13: 5836. <https://doi.org/10.3390/SU13115836>
51. Trinh QT, Bal Krishna KC, Salih A, Listowski A, Sathasivan A. Biofilm growth on PVC and HDPE pipes impacts chlorine stability in the recycled water. *J Environ Chem Eng*. 2020; 8: 104476. <https://doi.org/10.1016/J.JECE.2020.104476>
52. Pokora R, Kutschbach S, Weigl M, Braun D, Eppele A, Lorenz E, et al. Investigation of superspreading COVID-19 outbreak events in meat and poultry processing plants in Germany: A cross-sectional study. *PLoS One*. 2021; 16: e0242456. <https://doi.org/10.1371/journal.pone.0242456> PMID: 34111143
53. Coronavirus: “Circulating air” may have spread COVID-19 to 1,500 German meat plant staff. In: Sky News [Internet]. 2020 [cited 18 Jan 2022]. Available: <https://news.sky.com/story/coronavirus-circulating-air-may-have-spread-covid-19-to-1-500-german-meat-plant-staff-12014156>
54. Zhang R, Li Y, Zhang AL, Wang Y, Molina MJ. Identifying airborne transmission as the dominant route for the spread of COVID-19. *Proc Natl Acad Sci U S A*. 2020; 117: 14857–14863. <https://doi.org/10.1073/pnas.2009637117> PMID: 32527856
55. Ahmed W, Bertsch PM, Bibby K, Haramoto E, Hewitt J, Huygens F, et al. Decay of SARS-CoV-2 and surrogate murine hepatitis virus RNA in untreated wastewater to inform application in wastewater-based epidemiology. *Environ Res*. 2020; 191: 110092. <https://doi.org/10.1016/j.envres.2020.110092> PMID: 32861728
56. Ren S-Y, Wang W-B, Gao R-D, Zhou A-M. Omicron variant (B.1.1.529) of SARS-CoV-2: Mutation, infectivity, transmission, and vaccine resistance. *World J Clin Cases*. 2022; 10: 1. <https://doi.org/10.12998/wjcc.v10.i1.1> PMID: 35071500
57. Cherian S, Potdar V, Jadhav S, Yadav P, Gupta N, Das M, et al. SARS-CoV-2 Spike Mutations, L452R, T478K, E484Q and P681R, in the Second Wave of COVID-19 in Maharashtra, India. *Microorganisms*. 2021; 9: 1542. <https://doi.org/10.3390/microorganisms9071542> PMID: 34361977
58. Callaway E, Ledford H. How bad is Omicron? What scientists know so far. *Nature*. 2021; 600: 197–199. <https://doi.org/10.1038/d41586-021-03614-z> PMID: 34857948
59. Farrell JM, Zhao CY, Tarquinio KM, Brown SP. Causes and Consequences of COVID-19-Associated Bacterial Infections. *Front Microbiol*. 2021; 12: 1911. <https://doi.org/10.3389/FMICB.2021.682571/BIBTEX>
60. Hanada S, Pirzadeh M, Carver KY, Deng JC. Respiratory viral infection-induced microbiome alterations and secondary bacterial pneumonia. *Front Immunol*. 2018; 9: 2640. <https://doi.org/10.3389/fimmu.2018.02640> PMID: 30505304
61. Moore MD, Jaykus LA. Virus–Bacteria Interactions: Implications and Potential for the Applied and Agricultural Sciences. *Viruses*. 2018; 10. <https://doi.org/10.3390/V10020061> PMID: 29393885
62. Wu Y, Cai P, Jing X, Niu X, Ji D, Ashry NM, et al. Soil biofilm formation enhances microbial community diversity and metabolic activity. *Environ Int*. 2019; 132. <https://doi.org/10.1016/j.envint.2019.105116> PMID: 31479959
63. Dula S, Ajayeoba TA, Ijabadeniyi OA. Bacterial biofilm formation on stainless steel in the food processing environment and its health implications. *Folia Microbiol (Praha)*. 2021; 66: 293–302. <https://doi.org/10.1007/s12223-021-00864-2> PMID: 33768506
64. Skrabar S, Ogorzal L, Helmi K, Maul A, Hoffmann L, Cauchie HM, et al. Occurrence and persistence of enteroviruses, noroviruses and F-specific RNA phages in natural wastewater biofilms. *Water Res*. 2009; 43: 4780–4789. <https://doi.org/10.1016/j.watres.2009.05.020> PMID: 19616820
65. Storey M V., Ashbolt NJ. Enteric virions and microbial biofilms—A secondary source of public health concern? *Water Sci Technol*. 2003; 48: 97–104. <https://doi.org/10.2166/WST.2003.0172>
66. Almand EA, Moore MD, Jaykus LA. Virus-Bacteria Interactions: An Emerging Topic in Human Infection. *Viruses*. 2017; 9. <https://doi.org/10.3390/v9030058> PMID: 28335562
67. Mittal R, Ni R, Seo JH. The flow physics of COVID-19. *J Fluid Mech*. 2020;894. <https://doi.org/10.1017/JFM.2020.330>
68. Dyal JW. COVID-19 Among Workers in Meat and Poultry Processing Facilities — 19 States, April 2020. *MMWR Morb Mortal Wkly Rep*. 2020; 69: 887–892. <https://doi.org/10.15585/MMWR.MM6918E3> PMID: 32379731

69. Leibowitz J, Kaufman G, Liu P. Coronaviruses: Propagation, Quantification, Storage, and Construction of Recombinant Mouse Hepatitis Virus. *Curr Protoc Microbiol.* 2011; 21: 1511. <https://doi.org/10.1002/9780471729259.mc15e01s21> PMID: 21538303
70. Mendoza EJ, Manguiat K, Wood H, Drebot M. Two Detailed Plaque Assay Protocols for the Quantification of Infectious SARS-CoV-2. *Curr Protoc Microbiol.* 2020; 57: 1–15. <https://doi.org/10.1002/cpmc.105> PMID: 32475066
71. Besselsen DG, Wagner AM, Loganbill JK. Detection of rodent coronaviruses by use of fluorogenic reverse transcriptase-polymerase chain reaction analysis. *Comp Med.* 2002; 52: 111–116. PMID: 12022389
72. Schmittgen TD, Livak KJ. Analyzing real-time PCR data by the comparative CT method. *Nat Protoc.* 2008; 3: 1101–1108. <https://doi.org/10.1038/nprot.2008.73> PMID: 18546601
